# Supplementary material
Source: PubMed Central journal article supplement (PMC4341470)
Supplement: ASN.2013101067_ASN2013101067SupplementaryData.pdf [file ASN.2013101067_ASN2013101067SupplementaryData.pdf]

Supplementary Table 1. Nucleotide sequences of the primers used for RT-PCR in this study

| <b>Genes</b>         | <b>Primer Sequence</b>                                                        |
|----------------------|-------------------------------------------------------------------------------|
| Mouse MMP-7          | Forward 5'- TAGGCGGAGATGCTCACTTT -3'<br>Reverse 5'- TTCTGAATGCCTGCAATGTC -3'  |
| Mouse Snail1         | Forward 5'- ATTCTCCTGCTCCCACTGC -3'<br>Reverse 5'- GACTCTTGGTGCTTGTGGAG -3'   |
| Mouse WT1            | Forward 5'-CATCCAGGCAGGAAAGTGT -3'<br>Reverse 5'-TGCAGTCAATCAGGTGTGCT -3'     |
| Mouse podocalyxin    | Forward 5'-GCCTTCACTTGCTCTTACGG -3'<br>Reverse 5'-AAAACCCGGTCATAACCACA -3'    |
| Mouse PAI-1          | Forward 5'- GGCCATTACTACGACATCCTG -3'<br>Reverse 5'- GGTCATGTTGCCTTTCCAGT -3' |
| Mouse $\beta$ -actin | Forward 5'- CAGCTGAGAGGGAAATCGTG -3'<br>Reverse 5'- CGTTGCCAATAGTGATGACC -3'  |
